# Supplementary material for: Effect of novel coronavirus disease 2019 infection on chronic kidney disease G1-G5, G5 Dialysis and G5 Transplantation
Source: Research Square preprint supplement (doi:10.21203/rs.3.rs-66274/v2), 2020-12-04
Supplement: Supplementary file 1 [file 055f2a25c49bfb9cd3a8ed0c.docx]

**Table S7c.** Continued.

| **Intubation** | **Ethambutol** | **Ceftriaxone** | **Azithromycin** | **Interferon-beta** | **PEEP** | **Remdesivir** | **Ceftazidime** | **vancomycin** | **Epinephrine** | **PE (FFP)** | **Atenolol** | **Nifedipine** | **Olmsartan** | **Antiviral** | **Mizoribine** | **Lisinopril** |
| --- | --- | --- | --- | --- | --- | --- | --- | --- | --- | --- | --- | --- | --- | --- | --- | --- |
|  |  |  |  |  |  |  |  |  |  |  |  |  |  |  |  |  |
|  |  |  |  |  |  |  |  |  |  |  |  |  |  |  |  |  |
|  |  | + | + |  |  |  |  | + |  |  |  |  |  |  |  |  |
|  |  |  |  |  |  |  |  |  |  |  |  |  |  |  |  |  |
|  |  |  |  |  |  |  |  |  |  |  |  |  |  |  |  |  |
|  |  | + |  |  |  |  |  |  |  |  |  |  |  | + |  |  |
|  |  |  |  |  |  |  |  |  |  |  |  |  |  |  |  |  |
|  |  |  |  |  |  |  |  |  |  |  |  |  |  |  |  |  |
|  |  |  | 500 mg/d |  |  |  |  |  |  |  |  |  |  |  |  |  |
|  |  |  |  |  |  |  |  |  |  |  |  |  |  |  |  |  |
|  |  |  | + |  |  |  |  |  |  |  |  |  |  |  |  |  |
|  |  |  |  |  |  |  |  |  |  |  |  |  |  |  |  |  |
|  |  |  | 500 mg Qd |  |  |  |  |  |  |  |  |  |  |  |  |  |
|  |  |  |  |  |  |  |  |  |  |  |  |  |  |  |  |  |
| + |  |  |  |  |  |  |  |  |  |  |  |  |  |  |  |  |
|  |  |  |  |  |  |  |  |  |  |  |  |  |  |  |  |  |
|  |  |  |  |  |  |  |  |  |  |  |  |  |  |  |  |  |
|  |  |  |  |  |  |  |  |  |  |  |  |  |  |  |  |  |
|  |  |  |  |  |  |  |  |  |  |  |  |  |  |  |  |  |
|  |  |  |  |  |  |  |  |  |  |  |  |  |  |  |  |  |
| + |  | + | + | + | 12cmH2O | + |  |  |  |  |  |  |  |  |  |  |
| + |  | + | + |  |  |  | + | + | + | + |  |  |  |  |  |  |
|  |  |  |  |  |  | + |  |  |  |  | + | + | + |  |  |  |
|  |  |  |  |  |  |  |  |  |  |  |  |  |  |  |  |  |
|  |  |  |  |  |  |  |  |  |  |  |  |  |  | + |  |  |
|  |  |  |  |  |  |  |  |  |  |  |  |  |  | + |  |  |
|  |  |  |  |  |  |  |  |  |  |  |  |  |  | + |  |  |
|  |  |  |  |  |  |  |  |  |  |  |  |  |  | + |  |  |
|  |  |  |  |  |  |  |  |  |  |  |  |  |  | + |  |  |
|  |  |  |  |  |  |  |  |  |  |  |  |  |  | + |  |  |
|  |  |  |  |  |  |  |  |  |  |  |  |  |  | + |  |  |
|  |  |  |  |  |  |  |  |  |  |  |  |  |  | + |  |  |
|  |  |  |  |  |  |  |  |  |  |  |  |  |  | + | + |  |
|  |  |  |  |  |  |  |  |  |  |  |  |  |  | + |  |  |
|  |  |  |  |  |  |  |  |  |  |  |  |  |  |  |  |  |
| + |  | + | + |  | 14 cmH2O |  |  |  |  |  |  |  |  |  |  | + |
| + |  |  | + |  |  |  |  |  |  |  |  |  |  |  |  |  |
| + |  |  | + |  |  |  |  |  |  |  |  |  |  |  |  |  |
|  |  |  |  |  |  |  |  |  |  | + |  |  |  |  |  |  |
|  |  |  |  |  |  |  |  |  |  |  |  |  |  |  |  |  |
|  |  |  |  |  |  |  |  |  |  |  |  |  |  |  |  |  |
|  |  |  |  |  |  |  |  |  |  |  |  |  |  |  |  |  |
|  |  |  |  |  |  |  |  |  |  |  |  |  |  |  |  |  |
|  |  |  |  |  |  |  |  |  |  |  |  |  |  |  |  |  |
|  |  |  |  |  |  |  |  |  |  |  |  |  |  |  |  |  |
|  |  |  |  |  |  |  |  |  |  |  |  |  |  |  |  |  |
|  |  | + |  |  |  |  |  | + |  |  |  |  |  |  |  |  |
|  |  |  |  |  |  |  |  |  |  |  |  |  |  |  |  |  |
|  |  | + |  |  |  |  |  |  |  |  |  |  |  |  |  |  |
|  |  |  |  |  |  |  |  |  |  |  |  |  |  |  |  |  |
| + |  |  |  |  |  |  |  |  |  |  |  |  |  |  |  |  |
| + |  |  |  |  | 10 CmH2O |  |  |  |  |  |  |  |  |  |  |  |
| + |  | + | + |  |  |  |  |  |  |  |  |  |  |  |  | + |
| + |  | + | + |  |  |  |  |  |  |  |  |  |  |  |  |  |
| + |  | + | + |  |  |  |  |  |  |  |  |  |  |  |  |  |
| + |  |  | + |  |  |  |  | + | + |  |  |  |  |  |  |  |
|  |  |  |  |  |  |  |  |  |  |  |  |  |  |  |  |  |
| + |  |  |  |  |  |  |  |  |  |  |  |  |  |  |  |  |
| + | + |  |  |  | + |  |  | + |  |  |  |  |  |  |  |  |
|  | + |  | + |  |  |  |  |  |  |  |  |  |  |  |  |  |
|  |  |  |  |  |  |  |  |  |  |  |  |  |  |  |  |  |
|  |  |  |  |  |  |  |  |  |  |  |  |  |  |  |  |  |
|  |  |  |  |  |  |  |  |  |  |  |  |  |  |  |  |  |
|  |  |  |  |  |  |  |  |  |  |  |  |  |  |  |  |  |
|  |  | + | + |  |  |  |  |  |  |  |  |  |  |  |  |  |
| + |  | + | + |  |  |  |  |  |  |  |  |  |  |  |  | + |
|  |  |  |  |  |  |  |  |  |  |  |  |  |  |  |  |  |
|  |  |  |  |  |  |  |  |  |  |  |  |  |  |  |  |  |

FFP, fresh frozen plasma; PE, plasma exchange; PEEP, positive end-expiratory pressure. Positive sign indicates presence and negative sign shows absence of it.
