# Supplementary material for: Effect of novel coronavirus disease 2019 infection on chronic kidney disease G1-G5, G5 Dialysis and G5 Transplantation
Source: Research Square preprint supplement (doi:10.21203/rs.3.rs-66274/v2), 2020-12-04
Supplement: Supplementary file 2 [file 0d1d7d0c54547fe5473fead9.docx]

**Table S1d.** Continued.

| **Lazareth** | **Zeng** | **Machado** | **Arpali** | **Bemtgen** | **Resch** | **Rinaldi** | **Guillen** | **Items** |
| --- | --- | --- | --- | --- | --- | --- | --- | --- |
| Y | Y | Y | Y | Y | Y | Y | Y | 1. Demographic characteristics described |
| Y | Y | Y | Y | Y | Y | Y | Y | 2. Subject history described |
| UC | UC | Y | UC | Y | Y | UC | Y | 3. Pre-intervention clinical condition described |
| Y | Y | Y | Y | Y | Y | Y | Y | 4. Diagnostic tests or assessment methods and results |
| Y | Y | Y | Y | Y | Y | Y | Y | 5. Intervention/treatment described |
| Y | Y | Y | Y | Y | Y | Y | Y | 6. Post-intervention clinical condition described |
| UC | UC | UC | Y | UC | UC | Y | Y | 7. Adverse events |
| Y | Y | Y | Y | Y | Y | UC | Y | 8. Takeaway lessons |
| 6/8 | 6/8 | 7/8 | 7/8 | 7/8 | 7/8 | 6/8 | 8/8 | Score total |

UC, unclear; Y, yes.
