# Supplementary material for: Effect of novel coronavirus disease 2019 infection on chronic kidney disease G1-G5, G5 Dialysis and G5 Transplantation
Source: Research Square preprint supplement (doi:10.21203/rs.3.rs-66274/v2), 2020-12-04
Supplement: Supplementary file 3 [file 1bfdfcae85f0e4c8bd338cfb.docx]

**Table S1c.** Continued.

| **Peleg** | **Cinar** | **Tagizadeh** | **Post-Case Report 2** | **Post-Case Report 1** | **Khatri** | **Prattes** | **Deliwala** | **Chenna** | **Meziyerh** | **Cappell** | **Zhu-2020** | **Bartiromo** | **Suwanwongse** | **Larsen** | **Wang-5** | **Wang-4** | **Wang-3** | **Wang-2** | **Wang-1** | **Items** |
| --- | --- | --- | --- | --- | --- | --- | --- | --- | --- | --- | --- | --- | --- | --- | --- | --- | --- | --- | --- | --- |
| Y | Y | Y | Y | Y | Y | Y | Y | Y | Y | Y | Y | Y | Y | Y | Y | Y | Y | Y | Y | 1. Demographic characteristics described |
| Y | Y | Y | Y | Y | Y | Y | Y | Y | Y | Y | Y | Y | Y | Y | Y | Y | Y | Y | Y | 2. Subject history described |
| Y | UC | UC | UC | Y | UC | UC | Y | Y | Y | Y | Y | UC | Y | Y | UC | UC | UC | UC | UC | 3. Pre-intervention clinical condition described |
| Y | Y | Y | Y | Y | Y | Y | Y | Y | Y | Y | Y | Y | Y | Y | Y | Y | Y | Y | Y | 4. Diagnostic tests or assessment methods and results |
| Y | Y | Y | Y | Y | Y | Y | Y | Y | Y | Y | Y | Y | Y | Y | Y | Y | Y | Y | Y | 5. Intervention/treatment described |
| Y | Y | Y | Y | Y | Y | Y | Y | Y | Y | Y | Y | Y | Y | Y | Y | Y | Y | Y | Y | 6. Post-intervention clinical condition described |
| UC | Y | Y | Y | UC | UC | UC | UC | UC | Y | UC | UC | Y | UC | UC | UC | UC | UC | UC | UC | 7. Adverse events |
| Y | Y | Y | Y | Y | Y | Y | Y | Y | Y | Y | Y | Y | Y | Y | Y | Y | Y | Y | Y | 8. Takeaway lessons |
| 7/8 | 7/8 | 7/8 | 7/8 | 7/8 | 6/8 | 6/8 | 7/8 | 7/8 | 8/8 | 7/8 | 7/8 | 7/8 | 7/8 | 7/8 | 6/8 | 6/8 | 6/8 | 6/8 | 6/8 | Score total |

UC, unclear; Y, yes.
