# Supplementary material for: Effect of novel coronavirus disease 2019 infection on chronic kidney disease G1-G5, G5 Dialysis and G5 Transplantation
Source: Research Square preprint supplement (doi:10.21203/rs.3.rs-66274/v2), 2020-12-04
Supplement: Supplementary file 5 [file 3d652819937360d956ec4797.docx]

**Table S5f.** Continued.

| **EM** | **CPK** | **Troponin I** | **Ferritin** | **Cytopenia** | **Hypertriglyceridemia** | **HIV** | **HBV** | **HCV** | **ANA** | **ANCA** | **RF** | **SARS in P. dialysis** | **Neutrophil ratio** |
| --- | --- | --- | --- | --- | --- | --- | --- | --- | --- | --- | --- | --- | --- |
|  |  |  |  |  |  |  |  |  |  |  |  |  |  |
|  |  |  |  |  |  |  |  |  |  |  |  |  |  |
|  |  |  |  |  |  |  |  |  |  |  |  |  |  |
|  |  |  |  |  |  |  |  |  |  |  |  |  |  |
|  |  |  |  |  |  |  |  |  |  |  |  |  |  |
|  |  |  |  |  |  |  |  |  |  |  |  |  |  |
|  |  |  |  |  |  |  |  |  |  |  |  |  |  |
|  |  |  |  |  |  |  |  |  |  |  |  |  |  |
|  |  |  |  |  |  |  |  |  |  |  |  |  |  |
|  |  |  | increased |  |  |  |  |  |  |  |  |  |  |
|  |  |  |  |  |  |  |  |  |  |  |  |  |  |
|  |  |  |  |  |  |  |  |  |  |  |  |  |  |
|  |  |  |  |  |  |  |  |  |  |  |  |  |  |
|  |  |  |  |  |  |  |  |  |  |  |  |  |  |
|  |  |  |  |  |  |  |  |  |  |  |  |  |  |
|  |  |  |  |  |  |  |  |  |  |  |  |  |  |
|  |  |  |  |  |  |  |  |  |  |  |  |  |  |
|  |  |  |  |  |  |  |  |  |  |  |  |  |  |
|  |  |  |  |  |  |  |  |  |  |  |  |  |  |
|  |  |  |  |  |  |  |  |  |  |  |  |  |  |
|  |  |  |  |  |  |  |  |  |  |  |  |  |  |
|  |  |  |  |  |  |  |  |  |  |  |  |  |  |
| Abnormal |  |  | 4254 mcg/l |  |  |  |  |  |  |  |  |  |  |
|  |  |  |  |  |  |  |  |  |  |  |  |  |  |
|  |  |  |  |  |  |  |  |  |  |  |  |  |  |
|  |  |  |  |  |  |  |  |  |  |  |  |  |  |
|  |  |  |  |  |  |  |  |  |  |  |  |  |  |
|  |  |  |  |  |  |  |  |  |  |  |  |  |  |
|  |  |  |  |  |  |  |  |  |  |  |  |  |  |
|  |  |  |  |  |  |  |  |  |  |  |  |  |  |
|  |  |  |  |  |  |  |  |  |  |  |  |  |  |
|  |  |  |  |  |  |  |  |  |  |  |  |  |  |
|  |  |  |  |  |  |  |  |  |  |  |  |  |  |
|  |  |  |  |  |  |  |  |  |  |  |  |  |  |
|  |  |  |  |  |  |  |  |  |  |  |  |  |  |
|  | 3,121,582 | neg<0.05 ng/ml | 1728 ng/ml |  |  |  |  |  |  |  |  |  |  |
|  |  |  | 1385 ng/ml | + | + |  |  |  |  |  |  |  |  |
|  |  |  | 2052 ng/ml |  |  |  |  |  |  |  |  |  |  |
|  |  |  |  |  |  | - | - | - | - | - | - |  |  |
|  |  |  |  |  |  |  |  |  |  |  |  | + |  |
|  |  |  |  |  |  |  |  |  |  |  |  |  |  |
|  |  |  |  |  |  |  |  |  |  |  |  |  |  |
|  |  |  |  |  |  |  |  |  |  |  |  |  |  |
|  |  |  |  |  |  |  |  |  |  |  |  |  |  |
|  |  |  |  |  |  |  |  |  |  |  |  |  |  |
|  |  |  |  |  |  |  |  |  |  |  |  |  | 84.4 |
|  |  |  |  |  |  | - | - | - | + |  |  |  |  |
|  | 13581 |  |  |  |  |  |  |  |  |  |  |  |  |
|  |  |  |  |  |  |  |  |  |  |  |  |  |  |
|  |  |  |  |  |  |  |  |  |  |  |  |  |  |
|  |  |  | 991 ng/ml |  |  |  | - | - |  |  |  |  |  |
|  | 45247 |  |  |  |  |  |  |  |  |  |  |  |  |
|  | 73 | 0.034ng/ml | 2724 |  |  |  |  |  |  |  |  |  | 86% |
|  | 232 |  | 251 |  |  |  |  |  |  |  |  |  |  |
|  |  |  | 465 ng/ml |  |  |  |  |  |  |  |  |  |  |
|  | 2135 u/l | 544ng/l=0.544 | 66165 |  |  |  |  |  |  |  |  |  |  |
|  |  |  |  |  |  |  |  |  |  |  |  |  |  |
|  |  |  |  |  |  |  |  |  |  |  |  |  |  |
|  |  |  |  |  |  |  |  |  |  |  |  |  |  |
|  | 1628 |  | 1868 |  |  |  |  |  |  |  |  |  |  |
|  |  |  | 1147 |  |  | - | - | - | - | - | - |  |  |
|  |  |  |  |  |  |  |  |  |  |  |  |  |  |
|  |  |  |  |  |  |  |  |  |  |  |  |  |  |
|  |  |  |  |  |  |  |  |  |  |  |  |  |  |
|  |  |  |  |  |  |  |  |  |  |  |  |  |  |
|  |  | 11.37 g/l=1.137 |  |  |  |  |  |  |  |  |  |  |  |
|  |  |  |  |  |  |  |  |  |  |  |  |  |  |
|  |  |  | 2672mg/l |  |  | - | - | - |  |  |  |  |  |

ANA, antinuclear antibody; ANCA, anti-neutrophilic cytoplasmic antibody; CPK, creatin phosphokinase; EM, electron microscopy; HBV, hepatitis B virus; H, hepatitis C virus; HIV, human immunodeficiency virus; P.dialysis, peritoneal dialysis; RF, renal failure. Positive sign indicates presence and negative sign depicts absence of it.
