# Supplementary material for: Effect of novel coronavirus disease 2019 infection on chronic kidney disease G1-G5, G5 Dialysis and G5 Transplantation
Source: Research Square preprint supplement (doi:10.21203/rs.3.rs-66274/v2), 2020-12-04
Supplement: Supplementary file 14 [file 974b700e4215dfc6dcfdfef2.docx]

**Table S5b.** Continued.

| **Sars-cov-2** | **Oropharyngeal swab** | **O2 saturation** | **SCr** | **Bun** | **K** | **Uric acid** | **Hb** | **B/C** | **Influenza** | **Respiratory viruses** | **PCT** | **IL-6** |
| --- | --- | --- | --- | --- | --- | --- | --- | --- | --- | --- | --- | --- |
| + | + | 90% |  |  |  |  |  |  |  |  | 0.73 ng/ml |  |
|  | + | 90% | 1432.3mmol/l | 40mmol/l | 4.63 mmol/l | 760mmol/l |  |  |  |  |  |  |
| + |  |  |  |  | nl |  | nl | - | - |  | + | + |
| + |  | hypoxemia |  |  |  |  |  |  |  |  |  |  |
| + |  | hypoxemia |  |  |  |  |  |  |  |  |  |  |
|  |  |  | 1.7 mg/dl |  |  |  |  |  |  |  |  | 26.22 pg/ml |
|  | + | 90-95 | 167.3 |  |  |  |  |  |  |  |  |  |
|  | + |  |  |  |  |  |  |  |  |  |  |  |
|  |  |  |  |  |  |  |  |  |  |  |  |  |
|  |  | 97 | 1.9 |  |  |  |  |  |  |  | 0.33mg/l=33 ng/ml | 86.3 ng/l=pg/ml |
|  | + | 97 | 1.5 |  |  |  |  |  |  |  |  | 280.86 pg/ml |
|  |  |  | 2.02 | 26 mg/dl | 5 |  | 14.5 |  |  |  |  |  |
|  |  |  | 1.85 | 33 mg/dl | 4.9 |  | 14.1 |  |  |  |  |  |
|  | + |  | 350 |  |  |  |  |  |  |  |  |  |
|  | + |  | 150 |  |  |  | 11 |  |  |  |  |  |
|  | + |  | 132 mmol/l |  |  |  |  |  |  |  |  |  |
|  | + |  | 180 |  |  |  |  |  |  |  |  |  |
|  | + |  | 165 |  |  |  | 7 |  |  |  |  |  |
|  | + |  | 145 |  |  |  |  |  |  |  |  |  |
|  | + |  | 450 |  |  |  |  |  |  |  |  |  |
|  | + | 98 | 1.3 mg/dl |  |  |  | 9.3 |  | A & B: - |  | 0.18 ng/ml |  |
| + |  | 93 | 0.7 | 17.5 mg/dl | 3.7 |  | 9.9 |  |  |  |  |  |
|  |  | 86% | 1.2 |  |  |  |  |  |  |  |  | nl<11pg/ml |
|  | + |  | 1.4 |  |  |  |  |  |  |  |  |  |
|  | + |  | 198 |  |  |  |  |  |  |  |  |  |
|  | + |  | 308 |  |  |  |  |  |  |  |  |  |
|  | + |  | 251 |  |  |  |  |  |  |  |  |  |
|  | + |  | 209 |  |  |  |  |  |  |  |  |  |
|  | + |  |  |  |  |  |  |  |  |  |  |  |
|  | + |  |  |  |  |  |  |  |  |  |  |  |
|  | + |  |  |  |  |  |  |  |  |  |  |  |
|  | + |  |  |  |  |  |  |  |  |  |  |  |
|  | + |  | 467 |  |  |  |  |  |  |  |  |  |
|  | + |  | 189 |  |  |  |  |  |  |  |  |  |
|  |  | 96 | 133 |  |  |  |  |  |  |  |  | 29 ng/l=pg/ml |
| -, + |  | 95% | 6.35 |  |  |  |  |  |  |  |  | 2436.7 pg/ml |
|  |  | desaturation | 0.7 |  |  |  |  |  |  |  |  | 74.3pg/ml |
|  |  | 96 | 0.9 |  |  |  |  |  |  |  |  | > 400 pg/ml |
|  |  |  | 224 mmol/l |  |  |  |  |  |  |  |  |  |
|  |  | mild hypoxemia |  |  |  |  |  |  |  |  |  |  |
| ? |  |  |  |  |  |  |  |  |  |  |  |  |
| ? |  |  |  |  |  |  |  |  |  |  |  |  |
| ? |  |  |  |  |  |  |  |  |  |  |  |  |
| ? |  |  |  |  |  |  |  |  |  |  |  |  |
| ? |  |  |  |  |  |  |  |  |  |  |  |  |
|  | + |  | 128.1 | 7.17mmol/l |  |  |  |  |  |  | 0.36 ng/ml |  |
| + |  |  | 3.85 | 34 mg/dl |  |  | 8.1 | - |  |  |  |  |
|  | + | 94 | 1.16, 1.38 |  |  |  |  |  | - |  |  |  |
|  | + | 99 | 2.29 |  | 4.6 |  |  |  |  |  |  | 10.3 pg/ml |
|  | + | 96 | 139 |  | 3 |  |  |  |  |  | nl | ­19.53 pg/ml |
|  |  | 97 | 1.24,3.75 mg/dl | 17 mg/dl | 3 mmol/l |  | 12 | sterile |  |  |  |  |
|  |  | hypoxemia | 1.8,3.6 |  |  |  |  |  |  |  |  |  |
| + |  | 95 | 3.68 | 62 mg/dl | 5.8 |  | 11.6 |  | - |  |  |  |
|  |  | 95 | 1.5 | 30 mg/dl | 4.3 |  |  | - |  |  |  | 25 pg/ml |
|  | + | 46 | 1.85,3.26 |  |  |  |  |  |  |  |  | 396pg/ml |
| + |  |  | 3.56,4.37 | 44 mg/dl |  |  |  | - |  |  | 8.16 ng/ml |  |
|  | + | 89 | 1.28,1.92 |  |  |  |  | - |  |  |  |  |
|  |  | 90 | 0.89-2.45 |  |  |  |  |  |  |  |  |  |
| + |  |  | 6.8 |  |  |  | 11 |  |  |  |  |  |
| +,6.6 (+) |  | 95 | 3.36 |  |  |  |  |  |  |  | 2.57ng/ml | 72.2 pg/ml |
|  |  |  | 1.1,12.5 | 69 mg/dl | 3.6 |  | 16.6 |  |  |  |  | (11d)12 pg/ml |
| + |  |  | 1.84 |  |  |  | 7.5 |  |  |  |  | 136.08 pg/ml |
| + |  |  |  |  |  |  |  |  |  |  | 0.22 ng/ml |  |
|  |  |  | 0.92 |  |  |  | 11.4 |  |  |  |  |  |
|  |  | hypoxia,96 | 1.68, 3.44 |  | 5.8 |  |  | - |  |  |  |  |
| + |  | 91.80% | 157mmol/l |  |  |  |  | + |  | - |  | 272.40 pg/ml |
|  |  |  | nl |  |  |  |  |  |  |  |  |  |
|  |  |  | 135, 289 |  |  |  |  |  |  |  |  |  |

B/C, blood culture; Bun, blood urea nitrogen; IL-6, interleukin-6; Hb, hemoglobin; PCT, procalcitonine; SCr, serum creatinine. Positive sign indicates presence and negative sign shows absence of it. Questionable sign indicates unclearity of positive test in patients.
