# Supplementary material for: Effect of novel coronavirus disease 2019 infection on chronic kidney disease G1-G5, G5 Dialysis and G5 Transplantation
Source: Research Square preprint supplement (doi:10.21203/rs.3.rs-66274/v2), 2020-12-04
Supplement: Supplementary file 21 [file e6936b682632c85d6f538b4e.docx]

**Table S5c.** Continured.

| **Flow cytometry** | **pH** | **Po2** | **Pco2** | **LDH** | **Nasopharyngeal swab** | **eGFR** | **Tacrolimus level** | **SNa** | **Fibrinogen** | **Absolute & Relative monocyte** | **Urinary antigen for p** | **Urinary antigen for legionella** |
| --- | --- | --- | --- | --- | --- | --- | --- | --- | --- | --- | --- | --- |
|  |  |  |  |  |  |  |  |  |  |  |  |  |
|  |  |  |  |  |  |  |  |  | 5.22 g/l=522 |  |  |  |
|  |  |  |  |  |  |  |  |  |  |  |  |  |
| low T-cell |  |  |  |  |  |  |  |  |  |  |  |  |
| low T-cell |  |  |  |  |  |  |  |  |  |  |  |  |
|  | 7.38 | 79 | 31 | 277 | + |  |  |  |  |  |  |  |
|  |  |  | 19.8 |  |  | 62-68 | 5-7 ng/ml | 136 | 5.22 g/l |  |  |  |
|  |  |  |  |  |  |  |  |  |  |  |  |  |
|  |  |  |  |  |  |  |  |  |  |  |  |  |
|  | Respiratory alkalosis |  |  | 178 | + | 31 | six- 8 ng/ml |  |  | 1000/mmc | - | - |
|  |  | 91 |  | nl | + | 50 |  |  |  |  |  |  |
|  |  |  |  |  | + | 41.2 | 3.8 ng/ml | 130 |  |  |  |  |
|  |  |  |  |  | + | 39.8 |  | 133 |  |  |  |  |
|  |  |  |  |  | + | 15-18 |  |  |  |  |  |  |
|  |  |  |  |  | + | 45 |  |  |  |  |  |  |
|  |  |  |  |  | + | 48 |  |  |  |  |  |  |
|  |  |  |  |  | + | 23 |  |  |  |  |  |  |
|  |  |  |  |  | + | 31 |  |  |  |  |  |  |
|  |  |  |  |  | + | 47 |  |  |  |  |  |  |
|  |  |  |  |  | + | 12 to 16 |  |  |  |  |  |  |
|  |  |  |  |  | + | 60 | 5.1 ng/ml | 129 |  |  |  |  |
|  |  |  |  | 727 |  |  |  | 139 |  |  |  |  |
|  |  |  |  |  | + |  |  |  |  |  |  |  |
|  |  | 51.8 | 27.9 |  |  |  |  |  |  |  |  |  |
|  |  |  |  |  |  |  |  |  |  |  |  |  |
|  |  |  |  |  |  |  |  |  |  |  |  |  |
|  |  |  |  |  |  |  |  |  |  |  |  |  |
|  |  |  |  |  |  |  |  |  |  |  |  |  |
|  |  |  |  |  |  |  |  |  |  |  |  |  |
|  |  |  |  |  |  |  |  |  |  |  |  |  |
|  |  |  |  |  |  |  |  |  |  |  |  |  |
|  |  |  |  |  |  |  |  |  |  |  |  |  |
|  |  |  |  |  |  |  |  |  |  |  |  |  |
|  |  |  |  |  |  |  |  |  |  |  |  |  |
|  |  |  |  |  | + | 51 |  |  |  |  |  |  |
|  | 7.292 | 84 | 45.7 |  |  |  |  |  | 741 mg/dl |  |  |  |
|  |  |  |  | 368 | + |  |  |  | 885 mg/dl |  |  |  |
|  |  |  |  |  | + |  |  |  | 183 mg/dl |  |  |  |
|  |  |  |  |  | + | anuric |  |  |  |  |  |  |
|  |  |  |  |  | -, + | anuric |  |  |  |  |  |  |
|  |  |  |  |  |  |  |  |  |  |  |  |  |
|  |  |  |  |  |  |  |  |  |  |  |  |  |
|  |  |  |  |  |  |  |  |  |  |  |  |  |
|  |  |  |  |  |  |  |  |  |  |  |  |  |
|  |  |  |  |  |  |  |  |  |  |  |  |  |
|  |  |  |  |  | + |  |  |  |  |  |  |  |
|  |  |  | 17 |  |  | 16 |  | 133 |  |  |  |  |
|  |  |  |  | 364 | + |  | 5-7 ng/ml |  |  |  |  |  |
|  | 7.43 | 88.2 | 26.6 |  | + | 27 | 7 ng/ml | 138 |  |  |  |  |
|  | 7.368 | 77.4 | 35 |  |  | 49.8 |  |  |  |  |  |  |
|  |  |  |  |  | + | 16 |  | 132 |  |  |  |  |
|  |  |  |  | 901 | + | 49 |  |  |  |  |  |  |
|  |  |  |  | 291 |  |  | 4.7 | 138 |  |  |  |  |
|  |  | 67 |  | 409 | + |  |  | 150 |  |  |  |  |
|  |  |  |  |  |  |  |  |  |  |  |  |  |
|  | 7.21 | 213 | 67 | 3332 | + |  |  | 115 |  |  |  |  |
|  |  |  |  | 290 |  | 37 |  |  | 616 mg/dl |  |  |  |
|  |  |  |  | 686 | + | 28 |  |  | 920 mg/dl |  |  |  |
|  |  |  | 45 | 1360 | + | 10.49 |  |  |  |  |  |  |
|  |  |  |  | 477 | + | 19.49 |  |  |  |  |  |  |
|  |  |  |  | 1504 | + | 93 |  | 132 |  |  |  |  |
|  |  |  |  |  | + |  |  |  |  |  |  |  |
|  |  |  |  |  |  |  |  |  |  |  |  |  |
|  |  |  |  |  | + | 85 | 6-8 ng/ml |  |  |  |  |  |
|  |  |  |  | 1855 | + | 22.9 (MDRD) | 7.23 | 127 |  |  |  |  |
|  | 7.049 | 66.2 | 76.4 |  |  |  |  |  |  |  |  |  |
|  |  |  |  |  |  |  |  |  |  |  |  |  |
|  |  |  |  | 477 UI/L | + |  |  |  | 5.7 g/l |  |  |  |

SNa, serum sodium; eGFR, estimated glomerular filtration rate; LDH, lactate dehydrogenase. Positive sign indicates presence and negative sign shows absence of it.
